1           **Path integration changes as a cognitive marker for vascular**  
2                           **cognitive impairment? – a pilot study**

3  
4 Ellen Lowry<sup>1,2</sup>, Vaisakh Puthusserypady<sup>1</sup>, Gillian Coughlan<sup>1</sup>, Stephen Jeffs<sup>1</sup>, Michael  
5 Hornberger<sup>1\*</sup>

6  
7  
8 <sup>1</sup>Norwich Medical School, University of East Anglia, Norwich, UK

9 <sup>2</sup>School of Psychology, University of East Anglia, Norwich, UK

10  
11 \*Correspondence:

12 Prof. Michael Hornberger

13 [m.hornberger@uea.ac.uk](mailto:m.hornberger@uea.ac.uk)

14  
15 Abstract count: 241

16 Main text count: 3579

17 Tables: 1

Figures: 3

18  
19 *Abbreviations:* VCI; vascular cognitive impairment, AD; Alzheimer's disease

20  
21 *Keywords:* Navigation<sub>1</sub>, egocentric<sub>2</sub>, virtual-reality<sub>3</sub>, dementia<sub>4</sub>, VCI<sub>5</sub>, vascular cognitive  
22 impairment<sub>6</sub>, vascular-dementia<sub>7</sub>

## 23 **ABSTRACT**

24 Path integration spatial navigation processes are emerging as promising cognitive markers for  
25 prodromal and clinical Alzheimer's disease (AD). However, such path integration changes  
26 have been little explored in Vascular Cognitive Impairment (VCI), despite neurovascular  
27 change being a major contributing factor to dementia and potentially AD. In particular, the  
28 sensitivity and specificity of path integration impairments in VCI compared to AD is unclear.  
29 In the current pilot study, we explore path integration performance in AD and VCI patient  
30 groups and hypothesise that i) medial parietal mediated egocentric processes will be more  
31 affected in VCI and ii) medial temporal mediated allocentric processes will be more affected  
32 in AD. This retrospective cross-sectional study included early stage VCI patients (n=9), AD  
33 patients (n=10) and healthy age-matched controls (n=20). All participants underwent  
34 extensive neuropsychological testing, as well as spatial navigation testing. The spatial  
35 navigation tests included the virtual reality 'Supermarket' task assessing egocentric (body-  
36 based) and allocentric (map-based) navigation as well as the 'Clock Orientation' test  
37 assessing egocentric and path integration processes. Results showed that egocentric path  
38 integration processes are only impaired in VCI, potentially distinguishing it from AD.  
39 However, in contrast to our prediction, allocentric path integration was similarly impaired for  
40 VCI and AD. These preliminary findings suggest limited specificity of allocentric path  
41 integration deficits between VCI and AD. By contrast, egocentric path integration deficits  
42 emerge as more specific to VCI, potentially allowing for more specific diagnostic and  
43 treatment outcome measures for vascular impairment in dementia.

## 44 **INTRODUCTION**

45 Vascular cognitive impairment (VCI) is the second most prevalent cause of cognitive decline  
46 after Alzheimer's disease (AD) and is thought to account for ~20% of all dementias  
47 (Goodman et al., 2017; van der Flier et al., 2018). Although, individuals with mixed (AD and  
48 VCI) pathology are estimated to account for up to 70% of all dementia cases (Toledo et al.,  
49 2013). Despite the high prevalence of vascular impairment, its cognitive correlates are still  
50 being explored. Clinically, VCI is considered to involve a decline in executive function and  
51 higher order cognition such as information processing, planning, set-shifting and working  
52 memory (Hachinski et al., 2006; Sachdev et al., 2014). These changes are mostly attributed to  
53 micro and macro infarcts in subcortical and cortical regions, as well as their connecting white  
54 matter tracts (Beason-Held et al., 2012; van der Flier et al., 2018), in particular affecting  
55 fronto-parietal networks. Nevertheless, attributing such executive changes to VCI specifically  
56 has remained challenging, as executive function can also present as part of AD or related  
57 pathophysiology (Girard et al., 2013; Guarino et al., 2018; Neufang et al., 2011). However,  
58 the recent development of novel spatial navigation cognitive markers for AD show promise  
59 in being more specific to underlying disease pathophysiology (Coughlan et al., 2018a) and  
60 may help to identify cognitive decline specific to VCI. A clear distinction between VCI and  
61 AD is critical as with appropriate intervention VCI can be slowed or halted whereas AD has a  
62 fixed and terminal prognosis.

63  
64  
65 Spatial navigation is a fundamental cognitive skill that requires the integration of egocentric  
66 (body-based) and allocentric (map-based) frames of orientation. Both frames are required for  
67 everyday navigation with egocentric and allocentric processes shifting as a function of  
68 navigational demands (McNaughton et al., 2006). Path integration is integral to spatial  
69 navigation as it allows an individual to keep track of and return to their starting location on  
70 the basis of visual, self-motion, vestibular and proprioceptive feedback which represent  
71 current position and heading direction in references to a permanent location (Etienne and  
72 Jeffery, 2004; Knierim, Neunuebel and Deshmukh, 2014; McNaughton et al., 2006). This

73 process involves translating distance travelled with changes in direction of movement either  
74 relative to our allocentric or egocentric orientation (Burgess, 2006). Multisensory (visual,  
75 self-motion, vestibular and proprioceptive) feedback combine egocentric and allocentric  
76 frames of reference, allowing path integration to continuously update this information,  
77 allowing one to keep track of one's position in space (Coughlan et al., 2018a; Rieser, 1989).

78  
79 Egocentric orientation relies more on the prefrontal and parietal cortex to localise the position  
80 of objects relative to the body (Arnold, Burles, Bray, Levy and Giuseppe, 2014; Goodale &  
81 Milner, 1992), the precuneus then uses these location cues to form the basis of an egocentric  
82 representation of the surrounding space, integrating self-motion cues with the egocentric  
83 reference frame (Woblers and Weiner, 2014). While, allocentric orientation is reliant on the  
84 formation of maps using place, grid and boundary vector cells situated mainly in the medial  
85 temporal lobe (Coughlan et al., 2018a; Lester et al., 2017). The integration of egocentric and  
86 allocentric frames occurs in the retrosplenial cortex (RSC), which is a critical interface  
87 between the medial temporal and medial parietal regions (Alexander & Nitz, 2015). Dorsal-  
88 medial regions of the RSC are thought to be implicated in orientating and recalling unseen  
89 locations from a current position in space, whilst ventro-lateral portions were more linked to  
90 updating and integrating scene information (Burles, Slone and Giuseppe, 2017).

91  
92 Tasks that tap into path integration therefore provide a promising ecological, cognitive  
93 framework to detect medial temporal and medial parietal pathophysiology. Not surprisingly,  
94 path integration has been already explored in AD (Morganti et al, 2013; Ritchie, 2018; Serino  
95 et al., 2014; Vlcek & Laczo, 2014) and the advent of VR based testing has allowed such tests  
96 to be clinically available (Morganti et al., 2013; Parizkova et al., 2018; Plancher et al., 2012).  
97 We have developed previously such a test, the Virtual Supermarket task, which is now used  
98 across many large cohorts and drug trials as it can reliably detect path integration differences  
99 in preclinical and clinical dementia populations (Tu et al., 2017; Tu et al., 2015). The VR task  
100 reliably measures spatial processes of: i) egocentric self-reference navigation; ii) allocentric  
101 map-based navigation and iii) heading direction. For example, we have previously shown  
102 that the test allows distinction of behavioural variant fronto-temporal dementia (bvFTD) from  
103 AD, with AD showing particularly problems in switching between egocentric and allocentric  
104 frames during path integration (Tu et al., 2017). Importantly, these switching problems in AD  
105 were associated with grey matter atrophy in the RSC (Tu et al., 2015).

106  
107 In contrast to the exciting findings in AD, less is known about path integration in VCI,  
108 despite path integration potentially allowing as well to tap into parietal deficits in VCI  
109 (Haight et al., 2015; Maguire, 1998; Papma et al., 2012; Wolbers et al., 2004). A previous  
110 case study by our group explored path integration in a 65 year old male with VCI. The  
111 findings showed that the vascular patient had normal performance on allocentric orientation  
112 but a clear and isolated deficit in egocentric and heading direction sub-components of the  
113 path integration tasks (Coughlan et al., 2018b). These findings are consistent with fronto-  
114 parietal network disruptions typically seen in vascular dementia patients (Beason-Held et al.,  
115 2012; Sachdev et al., 2014; van der Flier et al., 2018) and may suggest medial parietal  
116 changes impeded the egocentric frame of reference and subsequent path integration.

117  
118 The current study leads on from this case study by exploring path integration in a group of  
119 VCI patients, and importantly comparing them against a group of AD patients and controls.  
120 Navigation will be tested using the Virtual Supermarket task where participants move  
121 through the virtual environment to a series of locations and are tested on their egocentric,  
122 allocentric and heading direction response. We hypothesise that i) medial parietal mediated

123 egocentric processes will be more affected in VCI; ii) medial temporal mediated allocentric  
124 processes will be more affected in AD.

125

## 126 **MATERIALS AND METHODS**

### 127 **Participants**

128 Nine vascular cognitive impairment and 10 Alzheimer's disease patients along with 20  
129 healthy controls were recruited to participate in a research study at the University of East  
130 Anglia as part of the wider The Dementia Research and Care Clinic (TRACC) study. The  
131 study was approved by the Faculty of Medicine and Health Sciences Ethics Committee at the  
132 University of East Anglia (reference 16/LO/1366) and written informed consent was obtained  
133 from all participants. Clinical diagnosis (VCI or AD) was classified by a consultant at the  
134 Norfolk and Suffolk Foundation Trust by interviewing the patient, examining  
135 neuropsychological assessment scores, structural clinical MRI scans and the patient's medical  
136 history. Disease duration was reported by the person's study partner (a spouse or relative).  
137 Participants had no history of psychiatric or neurological disease, substance dependence  
138 disorder or traumatic brain injury and had normal or corrected-to-normal vision. All  
139 participants underwent neuropsychological screening, including cognitive screening, episodic  
140 memory and spatial memory tasks, Addenbrooke's cognitive examination (ACE-III), Rey-  
141 Osterrieth Complex Figure Test (RCFT) copy and with 3-min delayed recall, Cube Analysis,  
142 Dot Counting and Position Discrimination from the Visual Object and Space Perception  
143 Battery (VOSP).

144

### 145 **Virtual Supermarket Task**

146 The Virtual Supermarket Task has been developed by our group previously and used in  
147 symptomatic mild cognitive impairment (MCI), AD, frontotemporal dementia (FTD) and  
148 VCI patients (Coughlan et al., 2018b; Tu et al., 2017; Tu et al., 2015). The VR task is an  
149 ecological test of spatial navigation abilities designed to simulate navigating through a real-  
150 world supermarket. An iPad 9.7 (Apple Inc.,) was used to show participants 20-40 second  
151 video clips of a moving shopping trolley in the virtual supermarket (Figure 1A-C). Videos  
152 were presented in a first-person perspective and participants are provided with optic flow  
153 cues from the moving shopping trolley and changing scenery as it followed different routes to  
154 reach a different end point in each trial. The task avoids the use of landmarks or salient  
155 features within the environment and limits the demand on episodic memory, reflecting  
156 similar tasks in the literature (see, Cushman, Stein and Duffy, 2008; Woblers, Weiner, Mallot  
157 and Büchel, 2017; Serino, Morganti, Di Stefano and Riva, 2015). The test taps into path  
158 integration processes via three core spatial processes: i) egocentric self-reference navigation;  
159 ii) allocentric map-based navigation and iii) heading direction. Once the video clip stops,  
160 participants indicate in real-life the direction of their starting point (egocentric orientation;  
161 Figure 1D). In a second step, participants indicate their finishing location on a birds-eye view  
162 map of the supermarket (allocentric orientation; Figure 1E), performance is calculated using  
163 the distance error (mm) between this and the coordinates of the actual finishing location. This  
164 map-based component provides an assessment of geocentric encoding of the virtual  
165 environment. The participant then indicates their heading direction at the finishing point,  
166 which determines the ability to which heading direction was encoded and updated throughout  
167 the task. The tasks consists of 14 trials and takes approximately 10 minutes to complete.

168

### 169 **Clock Orientation test**

170 The Clock Orientation test has also been developed by our lab (Coughlan et al., 2018b) as a  
171 bedside clinical test for egocentric orientation. It requires participants to imagine they are  
172 standing in the centre of a large clock, facing a particular number, e.g., the number 3.

173 Participants are then asked “which number is directly behind you?” (Answer: number 9).  
174 Next participants are asked to point, in real-life, to the positions of different numbers on the  
175 clock face in relation to the number that they are currently facing. For example, “You are  
176 facing number 12, can you point to the number 3?” (Answer: pointing right). The questions  
177 increase in complexity across the test and require medial parietal mediated mental imagery,  
178 rotation and egocentric processes, with no episodic memory demand. The test consists of 12  
179 trials and takes 5-10 minutes to complete.

180

#### 181 Procedure

182 Participants completed a battery of neuropsychological assessments at their home (see Table  
183 1 for list of tasks). In a second session held at the Norfolk and Suffolk Foundation Trust,  
184 participants undertook cognitive experimental tests (including the virtual Supermarket task  
185 and Clock Orientation test) and completed a clinical interview with the Chief Investigator of  
186 the study.

187

#### 188 Statistical Analysis

189 Statistical analysis was performed using IBM SPSS (Version 25). Chi square and two tailed  
190 one-way univariate analysis of variance (ANOVA) were used to test the significance of any  
191 demographic or neuropsychological differences between the clinical groups. When  
192 quantifying group differences, partial eta squared ( $n_p^2$ ) was used as a measure of effect size.  
193 The Supermarket task has 3 measures -specifically egocentric response, allocentric response  
194 and heading direction. Each outcome measure was individually entered into a one-way  
195 analysis of covariance (ANCOVA) with group as the independent variable and age and sex as  
196 covariates. The Clock Orientation test was also analysed using a one-way ANCOVA with  
197 group as the independent variable and age and sex as covariates. Post-hoc pairwise  
198 comparisons were conducted using Bonferroni adjustment for multiple comparisons.  
199 Sensitivity and specificity of the egocentric supermarket task and clock orientation test  
200 performance in VCI and AD were compared using logistic regression and ROC curve  
201 analysis. A Z-score of AD performance was computed for 7 missing values for one AD  
202 patient in the Virtual Supermarket test.

203

(Insert figure 1)

204

205

## 206 RESULTS

### 207 Demographics and Neuropsychology

208 Participant groups were well matched and no significant differences in demographic  
209 measures were observed between the VCI, AD and control groups (all p-values > .1).  
210 ANOVA of participant groups showed both VCI and AD patients performed significantly  
211 lower on a general cognitive screening test (ACE-III) and the memory recall domain of  
212 RCFT compared to controls (all p-values < .01). Results showed no significant  
213 neuropsychological differences between the VCI and AD patients for the ACE-III, RCFT  
214 recall condition, VOSP dot counting and cube analysis sub-sets (all p-values > 0.1. However,  
215 VCI patients were significantly more impaired than AD patients in the RCFT copy condition,  
216 FCSRT free recall condition and the VOSP position discrimination (all p-values < .1) (see  
217 table 1).

218

219

(Insert table. 1)

220

221 Virtual Supermarket Task

222 An ANCOVA with age and gender as covariates revealed a significant differences between  
223 egocentric responses on the supermarket test,  $F(2, 34) = 8.14, p < .001, n_p^2 = .32$ . Post-hoc  
224 comparisons revealed significantly greater egocentric impairment in VCI (M= 3.5, SD= 3.24)  
225 compared to AD (M= 10.01, SE= 1.11),  $p < .002, 95\% \text{ CI} [-10, -2.1]$  and control groups (M=  
226 8.1, SD= 3.7),  $p < .009, 95\% \text{ CI} [-7.95, -1.1]$ . No other significant group differences were  
227 observed ( $p > .1$ ) (see figure 2A).

228

229 Allocentric responses showed a significance difference between groups, controlled for age  
230 and gender  $F(2,34) = 10.1, p < .001, n_p^2 = .37$ . Post-hoc comparisons showed significantly  
231 greater impairments in VCI patients (M = 68.33, SD= 38.1) compared to controls (M= 30.85,  
232 SD= 14.13),  $p < .001, 95\% \text{ CI} [16.02, 61.1]$  but impairments did not reach statistical  
233 significance in AD patients (M= 50.1, SD= 7),  $p = 0.09, 95\% \text{ CI} [-41.11, 2.1]$  compared to  
234 controls. However, there were no significant groups differences between VCI and AD ( $p > .1$ )  
235 (see figure 2B).

236

237 Heading direction (correct judgement of facing direction after travel period) did not reveal  
238 significant group differences when controlling for age and gender  $F(2, 34) = 1.11, p > .1, n_p^2$   
239  $= .06$  (see figure 2C).

240

#### 241 Clock Orientation Test

242 An ANCOVA with age and gender as covariates revealed a significant difference between  
243 egocentric responses on the Clock Orientation task  $F(2, 34) = 13.4, p < .001, n_p^2 = .44$ . Post-  
244 hoc comparisons showed significantly greater egocentric deficits in VCI patients (M= 5.42,  
245 SD= 3.16) compared to AD (M= 10.1, SD= 1.21),  $p < .001, 95\% \text{ CI} [-7.2, -2]$  and control  
246 groups (M= 9.65, SD= 2.06),  $p < .001, 95\% \text{ CI} [-6.56, -7.1]$ . No other significant group  
247 differences were observed ( $p > .1$ ) (see figure 2D).

248

249 *(Insert Figure. 2)*

250

#### 251 Sensitivity and Specificity

252 Sensitivity and specificity of egocentric supermarket and clock test performance in VCI and  
253 AD were explored using logistic regression and ROC curves. Logistic regression indicated  
254 that the regression model based on egocentric scores of Supermarket and Clock Orientation  
255 predictors was statistically significant,  $X^2(2) = 16.36, p < .001$ . The model explained 77%  
256 (Nagelkerke  $R^2$ ) of variance in VCI and AD patients and correctly classified 84% of patients  
257 (7 out of 9 VCI; 9 out of 10 AD) into their respective cohorts. ROC curves were computed  
258 for the supermarket and clock test predictors in discerning VCI from AD patients. Similarly,  
259 Area Under the Curve (AUC) values indicated that egocentric orientation in the Supermarket  
260 (AUC = .8, SE = .12; 95% CI [.56, 1]) and Clock test (AUC= .91, SE = .06, 95% CI [.8, 1])  
261 had strong diagnostic accuracy in distinguishing VCI from AD patients.

262

263 *(Insert Figure. 3)*

264

## 265 DISCUSSION

266 Overall, our results indicate that medial parietal mediated egocentric path integration  
267 processes are a sensitive and specific cognitive marker selective for VCI. By contrast,  
268 allocentric orientation deficits were less sensitive, and not specific to distinguish between the  
269 underlying pathologies.

270

271 In more detail, the egocentric path integration measures of the Virtual Supermarket task and  
272 Clock Orientation test successfully detect vascular changes in patient populations. More  
273 importantly, the measures allowed to reliably distinguish vascular from AD pathophysiology  
274 in the patient populations. Notably, egocentric orientation was impaired in VCI, but relatively  
275 intact in AD patient groups when controlling for age and gender. This supports findings from  
276 our vascular patient case study (Coughlan et al., 2018b) and suggests egocentric impairments  
277 indicate a more medial parietal focused change (Weniger et al., 2009) in VCI. Furthermore,  
278 the AD patient's egocentric ability remained intact which supports suggestions that MCI and  
279 earlier stage AD groups show an undisturbed egocentric orientation (Coughlan et al., 2019).  
280 It would be interesting to explore whether more moderate to advanced AD patients might  
281 show problems using both allocentric and egocentric orientation, as it is known that medial  
282 parietal structures might be affected only later in the disease course (Braak & Del Tredici,  
283 2015).

284

285 The egocentric demands in the virtual Supermarket requires the individual to form an  
286 accurate representation of the starting point by integrating virtual self-motion with heading  
287 direction to reach their end destination. Path integration plays an important role in updating  
288 spatial orientation during self-motion but this process is accumulative, therefore can be liable  
289 to directional errors with respect to the original starting position (McNaughton et al., 2006),  
290 which may be responsible for problems observed across both egocentric tasks. The Clock  
291 Orientation test also demands path integration to configure the position of numbers on a  
292 clock face relative to the individual's current position. Both tasks rely on accessing scene  
293 construction, mental rotation and imagery translated from an egocentric orientation. At the  
294 neural level, translation of these egocentric processes depend mainly on medial parietal  
295 cortex (Coughlan et al., 2018a; Galati et al., 2000; Goodale & Milner, 1992; Zaehle et al.,  
296 2007) as well as prefrontal cortex (Bird et al., 2012; Spiers, 2008; Spiers & Barry, 2015),  
297 indicating potential disruptions in fronto-parietal structures typically seen in vascular patients  
298 (Beason-Held et al., 2012; Heiss et al., 2016; van der Flier et al., 2018; Vipin et al., 2018).

299

300 Medial parietal mediated egocentric deficits appear to characterise VCI patients. This is  
301 consistent with emerging evidence suggesting the earliest signs of dysfunction appear in  
302 medial frontal and anterior cingulate regions in at VCI-risk individuals (Haight et al., 2015;  
303 Papma et al., 2012), which is accompanied by a more typical vascular profile of reduced  
304 integrity of white matter in the bilateral superior longitudinal fasciculus (Beason-Held et al.,  
305 2012). Since egocentric orientation does not deteriorate in healthy aging and early stage AD,  
306 compared to medial temporal based cognitive functions (for review, see Colombo et al.,  
307 2017) it emerges as a potential powerful cognitive marker to identify early vascular-related  
308 pathology. Given the prevalence of vascular related dementia it is surprising that  
309 investigation to isolate cognitive deficits unique to this pathology is so sparse. However,  
310 based on our findings, it appears that egocentric orientation may be a useful diagnostic tool to  
311 discriminate VCI from other neurodegenerative conditions.

312

313 Our study suggests allocentric orientation deficits were not statistically present in AD, only  
314 VCI showed significant impairments compared to healthy controls. This does not support our  
315 prediction that allocentric deficits would be more profound in AD. The literature suggests  
316 allocentric deficits are more prominent in preclinical AD (Coughlan et al., 2019) with a loss  
317 in selectivity as the disease stage progresses and deficits become more widespread (Braak &  
318 Del Tredici, 2015). Yet, in the early stage AD patients in our study results did not reach  
319 significance. One potential explanation for the results observed may be provided by the large  
320 range in allocentric scores across the VCI group. VCI is a highly heterogeneous disorder in

321 terms of disease pathology and subsequent cognitive impairments which may account for this  
322 variation, compared AD pathology and symptoms are more uniform. Indeed, as evident from  
323 Figure 2, it is clear that AD patients perform differently from controls but this did not reach  
324 statistical significance. VCI patients revealed both egocentric and allocentric orientation  
325 problems which is likely to represent a disruption to translational and integration processes  
326 where both frames are combined to produce effective navigation. This view also explains the  
327 reduced visuospatial performance exhibited by the VCI patients during neuropsychological  
328 testing across RCFT copy and position discrimination tasks. It is also important to consider  
329 the domain of memory when interpreting our findings. Results from the FCSRT suggest VCI  
330 patients had significantly worse memory than the AD and control groups, sub-score results  
331 indicate this is driven by reduced performance during free recall. This is likely due to the  
332 retrieval demands on pre-frontal and parietal structures (Staresina and Davachi, 2006) which  
333 are typically disrupted in VCI. However, when cued VCI patients outperform AD patients.  
334 This finding is consistent with evidence that suggests providing a cue has little bearing on  
335 improved memory recall in AD (Sarazin et al., 2007; Wagner et al., 2012). This may be  
336 relevant to the poor allocentric results observed for VCI patients, as reduced retrieval  
337 mechanisms may have disrupted their task performance opposed to pure allocentric (medial  
338 temporal) mapping problems, which we would expect to see in the AD patients.

339  
340 Despite these exciting findings, our study is not without limitations. First and foremost, the  
341 sample sizes for the groups were small and therefore replication in larger patient cohorts  
342 would be important. Further, clinical characterisation of VCI subtypes (Skrobot et al., 2017)  
343 would help to better classify vascular pathology and determine accompanying cognitive  
344 symptoms, this may also help inform the variation of results seen in allocentric performance  
345 for the VCI patients. Finally, we did not have neuroimaging biomarker confirmation of  
346 vascular or AD pathophysiology. Confirmation of vascular lesions and their locations, as well  
347 as AD specific biomarkers would be important in the future to corroborate our cognitive  
348 findings.

349  
350 Nevertheless, to our knowledge this is the first study to isolate a selective navigational deficit  
351 in VCI. This showcases the important role of virtual navigation and spatial tests in the future  
352 development of sensitive and specific diagnostic tests for VCI. Further investigation into the  
353 cognitive symptoms selective to VCI as well as longitudinal cohort studies in at VCI-risk  
354 individuals is critical to identify the emergence of the disease and intervene with therapeutic  
355 strategies as early as possible.

356  
357 In conclusion, our findings show a distinct egocentric orientation deficit that is specific for  
358 VCI relative to AD. This is critical given the lack of specificity in current diagnostic tests and  
359 the indistinct diagnostic criteria for cognitive symptoms in VCI. In turn, this will inform  
360 diagnostic work-ups and aid personalised treatment pathways to treat underlying vascular  
361 changes in patients.

### 362 363 **AUTHOR CONTRIBUTION**

364 EL and MH contributed to the conception and design of the study, statistical analysis and the  
365 intellectual contribution to the writing of the manuscript. VP, GC and SJ contributed to the  
366 data collection and intellectual contribution to the manuscript.

### 367 368 **FUNDING**

369 This study was funded by the University of East Anglia.

370



371 **CONFLICT OF INTEREST**

372 There are no known conflicts of interest.

373

374 **ACKNOWLEDGEMENTS**

375 We would like to thank the Norfolk and Suffolk Foundation Trust and the patients and  
376 families involved in the TRACC study.

377 **REFERENCES**

- 378 Alexander, A., & Nitz, D. (2015). Retrosplenial cortex maps the conjunction of internal and  
379 external spaces. *Nat Neurosci*, 18(8), 1143-1151. doi:10.1038/nn.4058
- 380 Beason-Held, L., Thambisetty, M., Deib, G., Sojkova, J., Landman, B., Zonderman, A., et al.,  
381 (2012). Baseline cardiovascular risk predicts subsequent changes in resting brain  
382 function. *Stroke*, 43(6), 1542-1547. doi:10.1161/STROKEAHA.111.638437
- 383 Bird, C. M., Bisby, J. A., & Burgess, N. (2012). The hippocampus and spatial constraints on  
384 mental imagery. *Frontiers in human neuroscience*, 6, 142.  
385 doi:10.3389/fnhum.2012.00142
- 386 Braak H, Del Tredici K. The preclinical phase of the pathological process underlying  
387 sporadic Alzheimer's disease. *Brain* 2015; **138**(Pt 10). doi: 2814-33.  
388 10.1093/brain/awv236
- 389 Burles, F., Slone, E., & Iaria, G. (2017). Dorso-medial and ventro-lateral functional  
390 specialization of the human retrosplenial complex in spatial updating and  
391 orienting. *Brain Structure and Function*, 222(3), 1481-1493.
- 392 Burgess, N. (2006). Spatial memory: how egocentric and allocentric combine. *Trends Cogn*  
393 *Sci*, 10(12), 551-557. doi:10.1016/j.tics.2006.10.005
- 394 Colombo, D., Serino, S., Tuena, C., Pedroli, E., Dakanalis, A., Cipresso, P., et al., (2017).  
395 Egocentric and allocentric spatial reference frames in aging: A systematic review.  
396 *Neurosci Biobehav Rev*, 80, 605-621. doi:10.1016/j.neubiorev.2017.07.012
- 397 Coughlan, G., Coutrot, A., Khondoker, M., Minihane, A. M., Spiers, H., & Hornberger, M.  
398 (2019). Toward personalized cognitive diagnostics of at-genetic-risk Alzheimer's  
399 disease. *Proc Natl Acad Sci U S A*, 116(19), 9285-9292.  
400 doi:10.1073/pnas.1901600116
- 401 Coughlan, G., Flanagan, E., Jeffs, S., Bertoux, M., Spiers, H., Mioshi, E., et al., (2018b).  
402 Diagnostic relevance of spatial orientation for vascular dementia: A case study.  
403 *Dement Neuropsychol*, 12(1), 85-91. doi:10.1590/1980-57642018dn12-010013
- 404 Coughlan, G., Laczó, J., Hort, J., Minihane, A. M., & Hornberger, M. (2018a). Spatial  
405 navigation deficits - overlooked cognitive marker for preclinical Alzheimer disease?  
406 *Nat Rev Neurol*, 14(8), 496-506. doi:10.1038/s41582-018-0031-x
- 407 Etienne, A. S., & Jeffery, K. J. (2004). Path integration in mammals. *Hippocampus*, 14(2),  
408 180-192.
- 409 Galati, G., Lobel, E., Vallar, G., Berthoz, A., Pizzamiglio, L., & Le Bihan, D. (2000). The  
410 neural basis of egocentric and allocentric coding of space in humans: a functional  
411 magnetic resonance study. *Exp Brain Res*, 133(2), 156-164.  
412 doi:10.1007/s002210000375
- 413 Girard S, Baranger K, Gauthier C, Jacquet, M., Bernard, A., Escoffier, G., et al., (2013).  
414 Evidence for early cognitive impairment related to frontal cortex in the 5XFAD  
415 mouse model of Alzheimer's disease. *J Alzheimers Dis*; 33(3): 781-96.  
416 doi:10.3233/JAD-2012-120982
- 417 Goodale, M., & Milner, A. (1992). Separate visual pathways for perception and action.  
418 *Trends in Neurosciences*, 15(1), 20-25. doi.org/10.1016/0166-2236(92)90344-8
- 419 Goodman, R., Lochner, K., Thambisetty, M., Wingo, T., Posner, S., & Ling, S. (2017).  
420 Prevalence of dementia subtypes in United States Medicare fee-for-service  
421 beneficiaries, 2011-2013. *Alzheimers Dement*, 13(1), 28-37.  
422 doi:10.1016/j.jalz.2016.04.002
- 423 Guarino A, Favieri F, Boncompagni I, Agostini F, Cantone M, Casagrande M. Executive  
424 Functions in Alzheimer Disease: A Systematic Review. *Front Aging Neurosci* 2018;  
425 10: 437. doi: 10.3389/fnagi.2018.00437

- 426 Hachinski, V., Iadecola, C., Petersen, R., Breteler, M., Nyenhuis, D., Black, S., et al., (2006).  
427 National Institute of Neurological Disorders and Stroke-Canadian Stroke Network  
428 vascular cognitive impairment harmonization standards. *Stroke*, 37(9), 2220-2241.  
429 doi:10.1161/01.STR.0000237236.88823.47
- 430 Haight, T., Bryan, R., Erus, G., Davatzikos, C., Jacobs, D., D'Esposito, M., et al., (2015).  
431 Vascular risk factors, cerebrovascular reactivity, and the default-mode brain network.  
432 *Neuroimage*, 115, 7-16. doi:10.1016/j.neuroimage.2015.04.039
- 433 Heiss, W., Rosenberg, G., Thiel, A., Berlot, R., & de Reuck, J. (2016). Neuroimaging in  
434 vascular cognitive impairment: a state-of-the-art review. *BMC Med*, 14(1), 174.  
435 doi:10.1186/s12916-016-0725-0
- 436 Knierim, J. J., Neunuebel, J. P., & Deshmukh, S. S. (2014). Functional correlates of the  
437 lateral and medial entorhinal cortex: objects, path integration and local-global  
438 reference frames. *Philosophical Transactions of the Royal Society B: Biological*  
439 *Sciences*, 369(1635), 20130369.
- 440 Lester, A. W., Moffat, S. D., Wiener, J. M., Barnes, C. A., & Wolbers, T. (2017). The aging  
441 navigational system. *Neuron*, 95(5), 1019-1035. doi:10.1016/j.neuron.2017.06.037
- 442 Maguire, E., Burgess, N., Donnett, J., Frackowiak, R., Frith, C., & O'Keefe, J. (1998).  
443 Knowing where and getting there: a human navigation network. *Science*, 280, 921-  
444 924. doi: 10.1126/science.280.5365.921
- 445 McNaughton, B., Battaglia, F., Jensen, O., Moser, E., & Moser, M. (2006). Path integration  
446 and the neural basis of the 'cognitive map'. *Nat Rev Neurosci*, 7(8), 663-678.  
447 doi:10.1038/nrn1932
- 448 Morganti, F., Stefanini, S., & Riva, G. (2013). From allo- to egocentric spatial ability in early  
449 Alzheimer's disease: a study with virtual reality spatial tasks. *Cogn Neurosci*, 4(3-4),  
450 171-180. doi:10.1080/17588928.2013.854762
- 451 Neufang S, Akhrif A, Riedl V, Forstl H, Kurz A, Zimmer C, et al., (2011). Disconnection  
452 of frontal and parietal areas contributes to impaired attention in very early  
453 Alzheimer's disease. *J Alzheimers Dis*; 25(2): 309-21. Doi: 10.3233/JAD-2011-  
454 102154
- 455 Papma, J., den Heijer, T., de Koning, I., Mattace-Raso, F., van der Lugt, A., van der Lijn, F.,  
456 et al., (2012). The influence of cerebral small vessel disease on default mode network  
457 deactivation in mild cognitive impairment. *Neuroimage Clin*, 2, 33-42.  
458 doi:10.1016/j.nicl.2012.11.005
- 459 Parizkova, M., Lerch, O., Moffat, S., Andel, R., Mazancova, A. F., Nedelska, Z., et al.,  
460 (2018). The effect of Alzheimer's disease on spatial navigation strategies. *Neurobiol*  
461 *Aging*, 64, 107-115. doi:10.1016/j.neurobiolaging.2017.12.019
- 462 Plancher, G., Tirard, A., Gyselinck, V., Nicolas, S., & Piolino, P. (2012). Using virtual reality  
463 to characterize episodic memory profiles in amnesic mild cognitive impairment and  
464 Alzheimer's disease: influence of active and passive encoding. *Neuropsychologia*,  
465 50(5), 592-602. doi:10.1016/j.neuropsychologia.2011.12.013
- 466 Rieser, J. (1989). Access to knowledge of spatial structure at novel points of observation.  
467 *Journal of Experimental Psychology: Learning, Memory, and Cognition*, 15(6), 1157-  
468 1165. doi:10.1037/0278-7393.15.6.1157
- 469 Ritchie, K., Carrière, I., Howett, D., Su, L., Hornberger, M. (2018). Allocentric and  
470 egocentric spatial processing in middle-aged adults at high risk of late-onset  
471 Alzheimer's disease : the PREVENT Dementia study. *Journal of Alzheimer's*  
472 *Disease*, 65(3), 885. doi:10.3233/JAD-180432
- 473 Sachdev, P., Kalaria, R., O'Brien, J., Skoog, I., Alladi, S., Black, S., et al., (2014). Diagnostic  
474 criteria for vascular cognitive disorders: a VASCOG statement. *Alzheimer Dis Assoc*  
475 *Disord*, 28(3), 206-218. doi:10.1097/WAD.0000000000000034

- 476 Sarazin, M., Berr, C., De Rotrou, J., Fabrigoule, C., Pasquier, F., Legrain, S., ... & Verny, M.  
477 (2007). Amnesic syndrome of the medial temporal type identifies prodromal AD: a  
478 longitudinal study. *Neurology*, *69*(19), 1859-1867.
- 479 Serino, S., Cipresso, P., Morganti, F., & Riva, G. (2014). The role of egocentric and  
480 allocentric abilities in Alzheimer's disease: a systematic review. *Ageing Res Rev*, *16*,  
481 32-44. doi:10.1016/j.arr.2014.04.004
- 482 Skrobot, O., O'Brien, J., Black, S., Chen, C., DeCarli, C., Erkinjuntti, T., et al., (2017). The  
483 Vascular Impairment of Cognition Classification Consensus Study. *Alzheimers*  
484 *Dement*, *13*(6), 624-633. doi:10.1016/j.jalz.2016.10.007
- 485 Spiers, H. (2008). Keeping the goal in mind: prefrontal contributions to spatial navigation.  
486 *Neuropsychologia*, *46*(7), 2106-2108. doi:10.1016/j.neuropsychologia.2008.01.028
- 487 Spiers, H., & Barry, C. (2015). Neural systems supporting navigation. *Current Opinion in*  
488 *Behavioral Sciences*, *1*, 47-55. doi:10.1016/j.cobeha.2014.08.005
- 489 Staesina, B. P., & Davachi, L. (2006). Differential encoding mechanisms for subsequent  
490 associative recognition and free recall. *Journal of Neuroscience*, *26*(36), 9162-9172.
- 491 Toledo, J., Arnold, S., Raible, K., Brettschneider, J., Xie, S. X., Grossman, M., et al., (2013).  
492 Contribution of cerebrovascular disease in autopsy confirmed neurodegenerative  
493 disease cases in the National Alzheimer's Coordinating Centre. *Brain*, *136*(Pt 9),  
494 2697-2706. doi:10.1093/brain/awt188
- 495 Tu, S., Spiers, H. J., Hodges, J. R., Piguet, O., & Hornberger, M. (2017). Egocentric versus  
496 Allocentric Spatial Memory in Behavioral Variant Frontotemporal Dementia and  
497 Alzheimer's Disease. *J Alzheimers Dis*, *59*(3), 883-892. doi:10.3233/JAD-160592
- 498 Tu, S., Wong, S., Hodges, J., Irish, M., Piguet, O., & Hornberger, M. (2015). Lost in spatial  
499 translation - A novel tool to objectively assess spatial disorientation in Alzheimer's  
500 disease and frontotemporal dementia. *Cortex*, *67*, 83-94.  
501 doi:10.1016/j.cortex.2015.03.016
- 502 van der Flier, W., Skoog, I., Schneider, J., Pantoni, L., Mok, V., Chen, C., et al., (2018).  
503 Vascular cognitive impairment. *Nat Rev Dis Primers*, *4*, 18003.  
504 doi:10.1038/nrdp.2018.3
- 505 Vipin, A., Loke, Y., Liu, S., Hilal, S., Shim, H., Xu, X., et al., (2018). Cerebrovascular  
506 disease influences functional and structural network connectivity in patients with  
507 amnesic mild cognitive impairment and Alzheimer's disease. *Alzheimers Res Ther*,  
508 *10*(1), 82. doi:10.1186/s13195-018-0413-8
- 509 Vlcek, K., & Laczó, J. (2014). Neural correlates of spatial navigation changes in mild  
510 cognitive impairment and Alzheimer's disease. *Front Behav Neurosci*, *8*, 89.  
511 doi:10.3389/fnbeh.2014.00089
- 512 Wagner, M., Wolf, S., Reischies, F. M., Daerr, M., Wolfsgruber, S., Jessen, F., ... & Hampel,  
513 H. (2012). Biomarker validation of a cued recall memory deficit in prodromal  
514 Alzheimer disease. *Neurology*, *78*(6), 379-386.
- 515 Weniger, G., Ruhleder, M., Wolf, S., Lange, C., & Irle, E. (2009). Egocentric memory  
516 impaired and allocentric memory intact as assessed by virtual reality in subjects with  
517 unilateral parietal cortex lesions. *Neuropsychologia*, *47*(1), 59-69.
- 518 Wolbers, T., Wiener, J. M., Mallot, H. A., & Büchel, C. (2007). Differential recruitment of  
519 the hippocampus, medial prefrontal cortex, and the human motion complex during  
520 path integration in humans. *Journal of Neuroscience*, *27*(35), 9408-9416.
- 521 Wolbers, T., & Wiener, J. M. (2014). Challenges for identifying the neural mechanisms that  
522 support spatial navigation: the impact of spatial scale. *Frontiers in human*  
523 *neuroscience*, *8*, 571.

- 524 Wolbers, T., Weiller, C., & Buchel, C. (2004). Neural foundations of emerging route  
 525 knowledge in complex spatial environments. *Brain Res Cogn Brain Res*, 21(3), 401-  
 526 411. doi:10.1016/j.cogbrainres.2004.06.013  
 527 Zaehle, T., Jordan, K., Wustenberg, T., Baudewig, J., Dechent, P., & Mast, F. W. (2007). The  
 528 neural basis of the egocentric and allocentric spatial frame of reference. *Brain Res*,  
 529 1137(1), 92-103. doi:10.1016/j.brainres.2006.12.044

530  
 531  
 532

**Table 1.** Demographic characteristics and Neuropsychological Performance.

|                             | VCI              | AD               | Control          | <i>Sig post-hoc VCI vs. AD comparisons</i> |
|-----------------------------|------------------|------------------|------------------|--------------------------------------------|
|                             | <i>Mean (SD)</i> | <i>Mean (SD)</i> | <i>Mean (SD)</i> |                                            |
| <i>n</i>                    | 9                | 10               | 20               |                                            |
| Sex (F/M)                   | 3/6              | 2/8              | 9/11             | <i>ns</i>                                  |
| Age                         | 70.22 (4.57)     | 69.91 (7.7)      | 69.6 (6.45)      | <i>ns</i>                                  |
| Disease duration            | 3.13 (2.64)      | 2.81 (2.21)      | n/a              | <i>ns</i>                                  |
| <b>General cognition</b>    |                  |                  |                  |                                            |
| Total ACE-III               | 69.44 (12.9)     | 72.1 (22.41)     | 95.1 (3.13)      | <i>ns</i>                                  |
| ACE: Attention              | 13.5 (.72)       | 15.75 (.72)      | 17.6 (.45)       | <i>ns</i>                                  |
| ACE: Memory                 | 13.5 (1.73)      | 17.13 (1.17)     | 24.3 (.74)       | <i>ns</i>                                  |
| ACE: Fluency                | 7.13 (.59)       | 8.12 (.59)       | 11.7 (.37)       | <i>ns</i>                                  |
| ACE: Language               | 21.77 (2.44)     | 22.33 (3.04)     | 25.6 (.61)       | <i>ns</i>                                  |
| ACE: Visuospatial           | 11.5 (1.19)      | 16.67 (1.12)     | 15.8 (.75)       | *                                          |
| <b>Visuospatial ability</b> |                  |                  |                  |                                            |
| RCFT: Copy                  | 22.1 (7.17)      | 28.4 (8.92)      | 32.72 (3.23)     | *                                          |
| RCFT: Recall                | 7 (5.65)         | 11.8 (8.12)      | 17.55 (5.43)     | <i>ns</i>                                  |
| Dot Counting                | 9.5 (0.71)       | 9.8 (0.42)       | 10 (0)           | <i>ns</i>                                  |
| Position Discrim            | 18.87 (1.27)     | 19.7 (0.67)      | 19.85 (0.37)     | *                                          |
| Cube Analysis               | 8.11 (2.62)      | 8.7 (1.88)       | 9.8 (0.52)       | <i>ns</i>                                  |
| <b>Memory ability</b>       |                  |                  |                  |                                            |
| Total FCSRT                 | 29.21 (2.84)     | 42.91 (2.63)     | 47.92 (2.01)     | **                                         |
| FCSRT: Free recall          | 8.83 (7.94)      | 17.14 (8.83)     | 26.83 (4.17)     | <i>ns</i>                                  |
| FCSRT:Cued recall           | 25.7 (4.94)      | 20.5 (7.2)       | 23.35 (4.87)     | <i>ns</i>                                  |
| <b>Supermarket test</b>     |                  |                  |                  |                                            |
| Egocentric                  | 3.44 (3.24)      | 9.4 (2.27)       | 8.1 (3.7)        | **                                         |
| Allocentric                 | 69.1 (38.11)     | 48.41 (12.17)    | 30.2 (14.13)     | <i>ns</i>                                  |
| Head direction              | 4.8 (1.33)       | 5 (3.41)         | 7.1 (0.9)        | <i>ns</i>                                  |
| <b>Clock test</b>           | 5.43 (0.81)      | 10.1 (1.2)       | 10.1 (0.51)      | ***                                        |

533 \* Significant group differences between VCI and AD patients. \* $p < .1$ , \*\* $p < .01$ , \*\*\* $p < .001$ .  
 534 ACE-III= Addenbrooke's cognitive examination. RCFT: Copy= Rey-Osterrieth Complex  
 535 Figure Task, copy condition. RCFT: Recall= Rey-Osterrieth Complex Figure Task, recall 3  
 536 minutes after copy. Dot Counting, Position Discrimination and Cube Analysis= sub-sets from  
 537 Visual Object and Space Perception Battery (VOSP). FCSRT: free recall= Free and Cued  
 538 Selective Reminding, free recall Test condition, FCSRT: free recall= Cued and Cued  
 539 Selective Reminding Test, cued condition.

540  
 541

542 **Figure 1.** Screenshots from the supermarket task, showing A) starting viewpoint, B)  
 543 movement during example video clip, C) end location of an example video clip, D) onscreen

544 instructions prompting participant to indicate direction of their starting point, E) the  
 545 supermarket map participants use to indicate their finishing location and their heading  
 546 direction when the video clip ends.

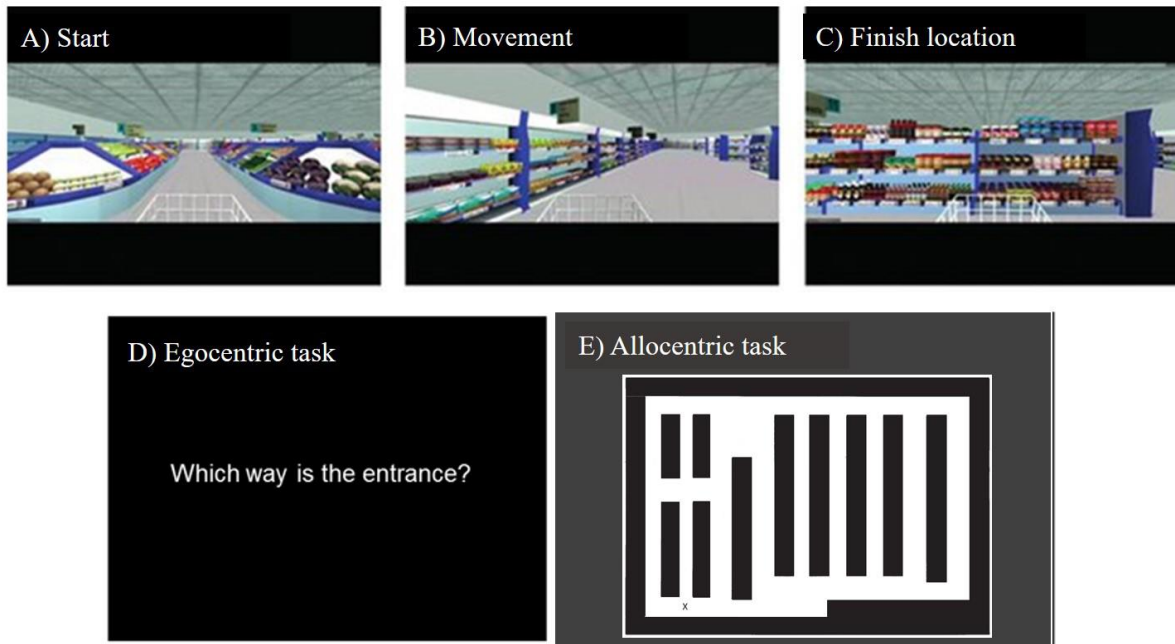

Tu et al (2015, 2017)

547  
 548

549 **Figure 2.** Spatial orientation performance between VCI, AD and Controls.  $**p < .01$ ,  
 550  $***p < .001$ . Supermarket task displays Egocentric response (correct), Allocentric response  
 551 (error in mm) and Heading response (correct). Clock Orientation test displays Egocentric  
 552 response (correct).

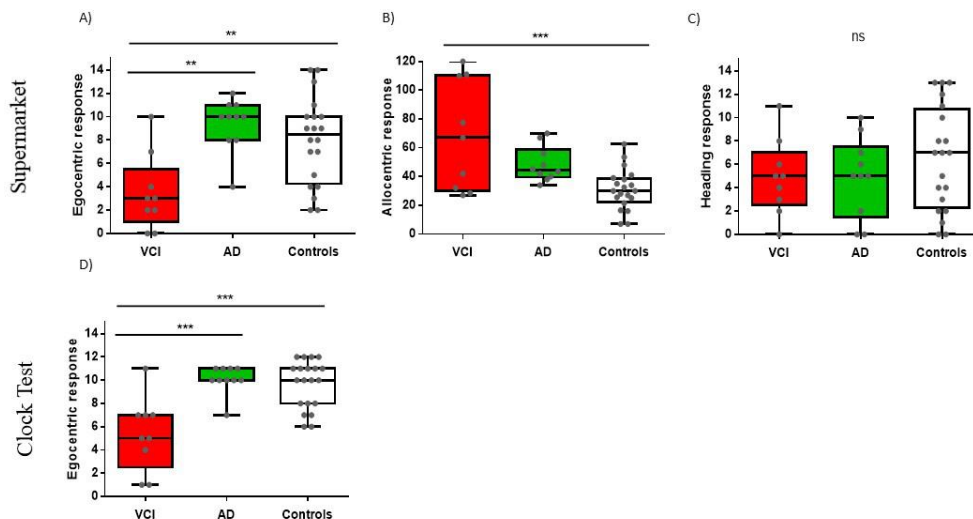

553  
 554  
 555

**Figure 3.** ROC curves for Supermarket task (blue line) and Clock test (purple line) predicting correct diagnosis (VCI or AD).

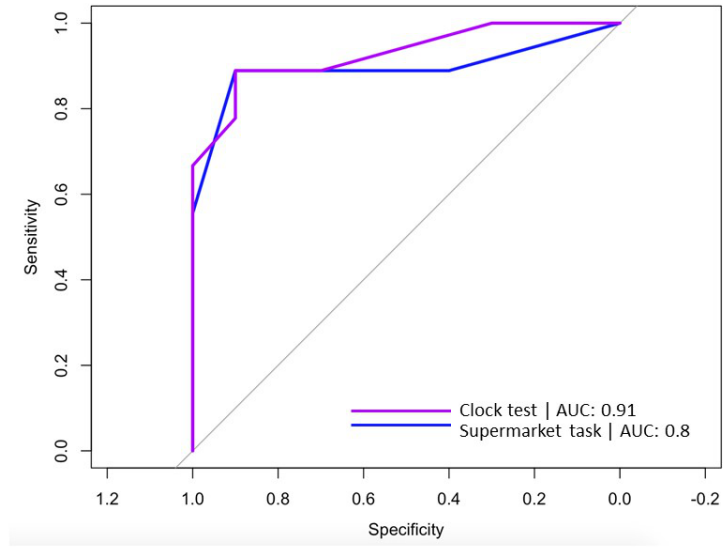

556
